# Supplementary material for: Vitamin B6 deficiency disrupts serotonin signaling in pancreatic islets and induces gestational diabetes in mice
Source: PubMed Central journal article supplement (PMC7998034; doi:10.1038/s42003-021-01900-0), 2021-03-26
Supplement: 42003_2021_1900_MOESM3_ESM.pdf [file 42003_2021_1900_MOESM3_ESM.pdf]

## Description of Additional Supplementary Files

**Files name:** Supplementary Data 1

**Description:** Source data underlying plots shown in figures.
